# Supplementary material for: Cathelicidin Attenuates Hyperoxia-Induced Lung Injury by Inhibiting Ferroptosis in Newborn Rats
Source: MDPI journal article supplement (doi:10.3390/antiox11122405), 2022-12-04
Supplement: s1 [file s1]

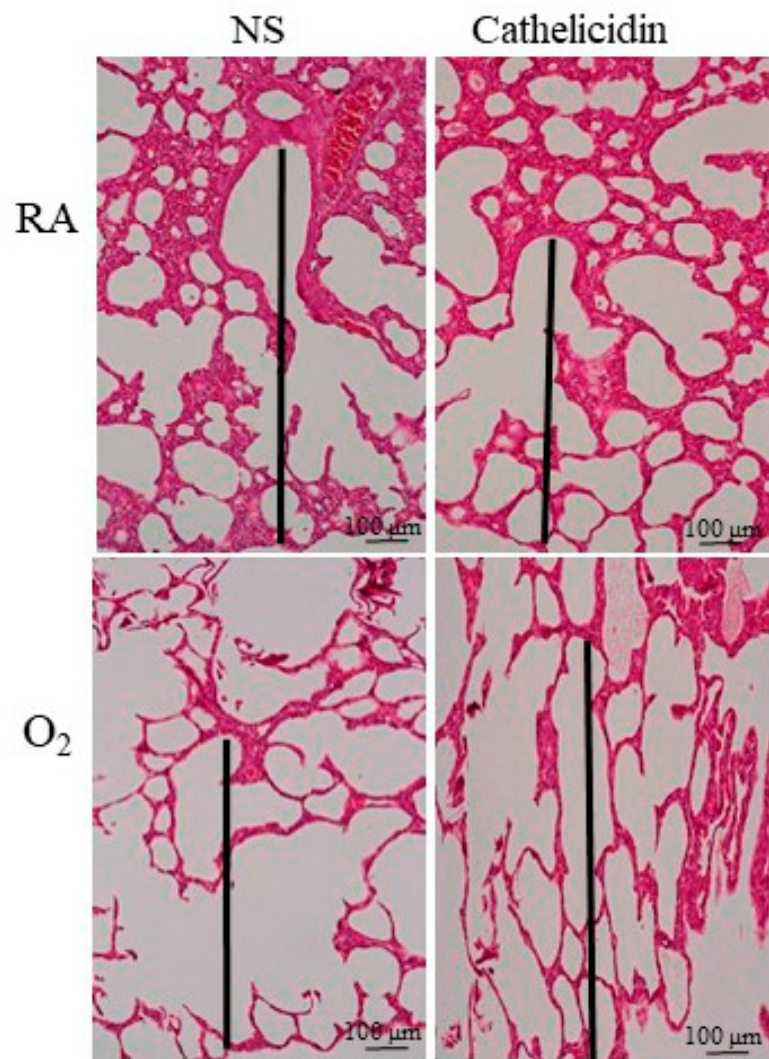

**Supplementary Figure S1.** RAC was measured by counting the number of alveoli passed by a vertical line from the center of the respiratory bronchioles to the border of the pleura.
